# Supplementary material for: Cytotoxicity Evaluation of Essential Oil and its Component from Zingiber officinale Roscoe
Source: PubMed Central journal article supplement — Toxicol Res. 2016 Jul 30;32(3):225–30. doi: 10.5487/TR.2016.32.3.225 (PMC4946420; doi:10.5487/tr.2016.32.3.225), 2016-07-30
Supplement: tr-32-225-suppl.pdf [file tr-32-225-suppl.pdf]

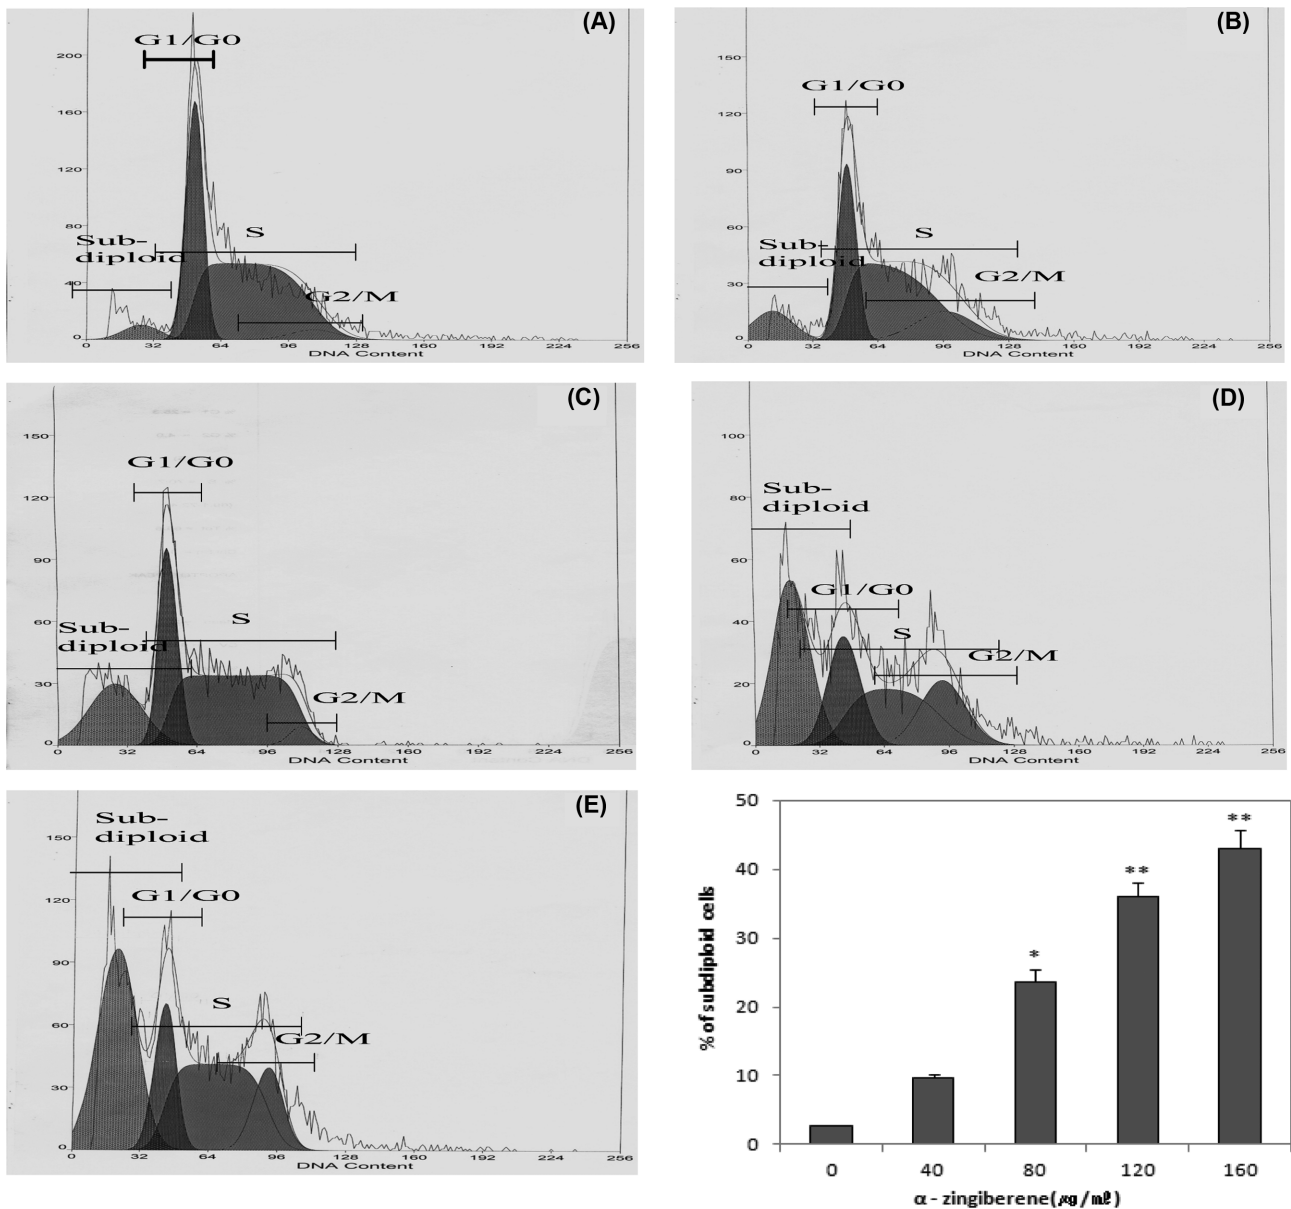

**Supplementary Fig. 1.** One of five replicates by flow cytometry analysis. Sub-diploid cell populations were increased after  $\alpha$ -zingiberene treatment. (A) Control (B) 40  $\mu\text{g}/\text{mL}$  (C) 80  $\mu\text{g}/\text{mL}$  (D) 120  $\mu\text{g}/\text{mL}$  (E) 160  $\mu\text{g}/\text{mL}$ . The percentage of sub-diploid cells in each concentration of  $\alpha$ -zingiberene was analysed. Data represent the mean values of five replicates, with bars indicating SEM. \*\* $p < 0.01$ , \* $p < 0.05$  compared to control. Cells were stained with PI, and the number of sub-diploid cells was counted using FACScan flow cytometry. Cells with a sub-diploid DNA content ( $> 5\%$  of  $G_0$  content) were considered to be apoptotic. Cell cycle distribution was analysed with ModFit LT v2.0.
